# Supplementary material for: Dissemination of Mycobacterium tuberculosis is associated to a SIGLEC1 null variant that limits antigen exchange via trafficking extracellular vesicles
Source: PubMed Central journal article supplement (PMC7807485; doi:10.1002/jev2.12046), 2021-01-14
Supplement: JEV2-10-e12046-s003.pdf [file JEV2-10-e12046-s003.pdf]

A

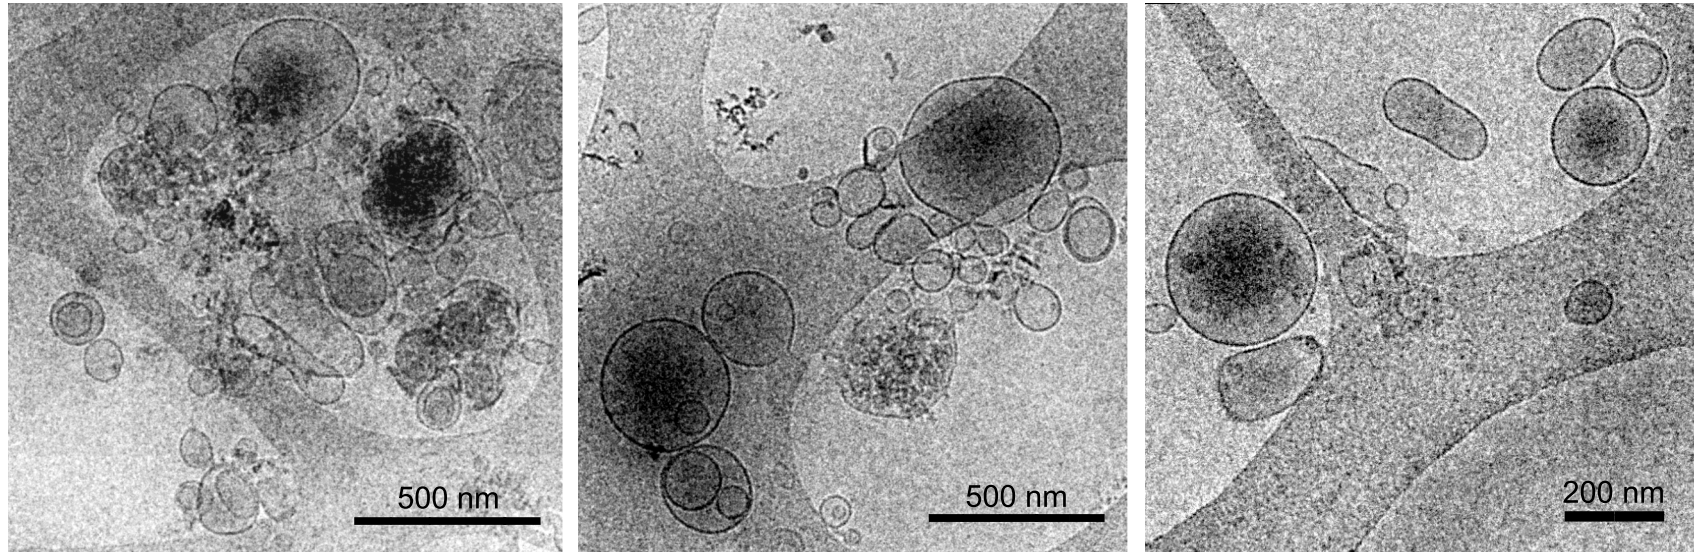

B

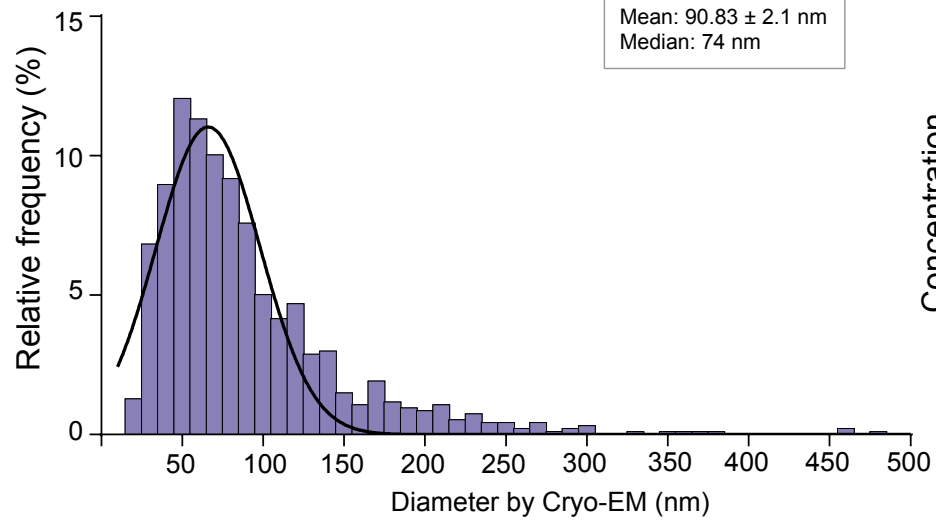

C

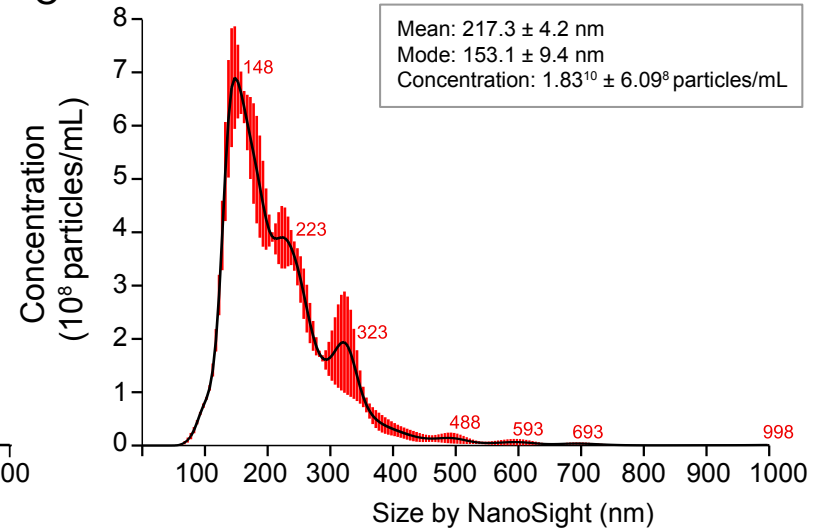

Supplementary Figure 3
