# Supplementary material for: Dissemination of Mycobacterium tuberculosis is associated to a SIGLEC1 null variant that limits antigen exchange via trafficking extracellular vesicles
Source: PubMed Central journal article supplement (PMC7807485; doi:10.1002/jev2.12046), 2021-01-14
Supplement: JEV2-10-e12046-s005.pdf [file JEV2-10-e12046-s005.pdf]

| Supplementary table 1. Demographic characteristics of individuals from the TB cohort |                                                                                                               |                                                                                                               |                                                                                                                |                                                                                                                 |
|--------------------------------------------------------------------------------------|---------------------------------------------------------------------------------------------------------------|---------------------------------------------------------------------------------------------------------------|----------------------------------------------------------------------------------------------------------------|-----------------------------------------------------------------------------------------------------------------|
|                                                                                      | Controls                                                                                                      |                                                                                                               | TB group                                                                                                       |                                                                                                                 |
|                                                                                      |  Null variant (heterozygous) |  Common variant (homozygous) |  Null variant (heterozygous) |  Common variant (homozygous) |
| Age median; (IQR)                                                                    | 25.5 (20-35.25)                                                                                               | 28 (21-41)                                                                                                    | 41.5 (32.75-52)                                                                                                | 39 (31-50)                                                                                                      |
| Female n; (%)                                                                        | 7 (14.9%)                                                                                                     | 764 (27%)                                                                                                     | 12 (21.4%)                                                                                                     | 592 (24%)                                                                                                       |
| Male n; (%)                                                                          | 40 (85.1%)                                                                                                    | 2066 (73%)                                                                                                    | 44 (78.6%)                                                                                                     | 1876 (76%)                                                                                                      |
| Russian mother n; (%)                                                                | 44 (93.6%)                                                                                                    | 2405 (84.9%)                                                                                                  | 49 (87.5%)                                                                                                     | 2099 (85%)                                                                                                      |
| Russian father n; (%)                                                                | 40 (85.1%)                                                                                                    | 2335 (82.5%)                                                                                                  | 45 (80.4%)                                                                                                     | 2024 (82%)                                                                                                      |

Supplementary Table 1
